# Supplementary material
Source: PubMed Central journal article supplement (PMC3021997)
Supplement: supp_124_3_348__1.pdf [file supp_124_3_348__1.pdf]

Supplementary Table S1. Cell culture details

| <b>Cell name:</b> | <b>Full details: (all human origin)</b>                     | <b>Supplier &amp; Cat #:</b> | <b>Growth media and supplement:</b> |
|-------------------|-------------------------------------------------------------|------------------------------|-------------------------------------|
| HUVEC<br>p        | Umbilical vein endothelial cells                            | Invitroge<br>n/C-015-<br>10C | Medium 200 + LSGS                   |
| HEMn-<br>LP       | Epidermal melanocytes – neonatal lightly pigmented donor    | Invitroge<br>n/C-002-<br>5C  | Medium 254 +<br>HMGS                |
| HMVE<br>Cnd       | Mammary microvasculature endothelial cells, neonatal dermis | Invitroge<br>n/C-010-<br>5C  | Medium 131 +<br>HMGS                |
| HPASM<br>C        | Pulmonary artery smooth muscle cells                        | Invitroge<br>n/C-009-<br>5C  | Medium 231 +<br>SMGS                |
| HEKn              | Eperidermal keratinocytes, neonatal                         | Invitroge<br>n/C-001-<br>5C  | Epilife + HKGS                      |
| HDFn              | Dermal fibroblasts, neonatal                                | Invitroge<br>n/C-004-<br>5C  | Medium 106 + LSGS                   |
| HMEC              | Mammary epithelial cells                                    | Invitroge<br>n/A10565        | HuMEC ready media<br>+ HuMEC/BPE    |
