# Supplementary material
Source: PubMed Central journal article supplement (PMC3021997)
Supplement: supp_124_3_348__2.pdf [file supp_124_3_348__2.pdf]

Supplementary Table S2. **Human mtDNA copy number primers**

|                   |                              |
|-------------------|------------------------------|
| Globin template_F | GCCACAGAATGGCTACGTTCC        |
| Globin template_R | GGGTATAGTCAGAGGAGCTTGC       |
| Globin_F          | GCTGTTCTGTCAATAAATTTC        |
| Globin_R          | CGAGTAAGAGACCATTGTGGCA<br>G  |
| ND1 template_F    | GGCATTCCCTAATGCTTACCG        |
| ND1 template_R    | TGAGTTTGATGCTCACCTG          |
| ND1_F             | ACGCCATAAACTCTTCACCAAA<br>G  |
| ND1_R             | GGGTTCATAGTAGAAGAGCGAT<br>GG |
