# Supplementary material
Source: PubMed Central journal article supplement (PMC3021997)
Supplement: supp_124_3_348__3.pdf [file supp_124_3_348__3.pdf]

Supplementary Table S3. **Mouse mtDNA copy number primers**

|                            |   |                            |
|----------------------------|---|----------------------------|
| Glucagon template_F        |   | GCCAATCAGACAAAACAGCA       |
| Glucagon template_R        |   | CCAAGAGGTTGCATTGGAAG       |
| Glucagon_F                 |   | GCTATTGGAAAGCCTCTTGC       |
| Glucagon_R                 |   | CAGGGCCATCTCAGAACC         |
| Cytochrome B<br>template_F |   | AACCTCCTATCAGCCATCCC       |
| Cytochrome B<br>template_R | B | GGGTGTTTAGTGGATTAGCT<br>GG |
| Cytochrome B_F             |   | CATTTATTATCGCGGCCCTA       |
| Cytochrome B_R             |   | TGTTGGGTTGTTTGATCCTG       |
