# Supplementary material
Source: PubMed Central journal article supplement (PMC3021997)
Supplement: supp_124_3_348__4.pdf [file supp_124_3_348__4.pdf]

Supplementary Table S4. **Gene expression primers for hESC differentiations and IMR31 fibroblast reprogramming to iPSCs.** RNF7 was shown to be a suitable housekeeping gene for normalizing expression during hESC differentiations (Synnergren et al., 2007).

|             |                            |
|-------------|----------------------------|
| RNF7_F      | AGATGTTCTCCCTCAAGAAG<br>TG |
| RNF7_R      | TAAGACAGGCATCCATCACC       |
| OCT4_F      | TCTCGCCCCCTCCAGGT          |
| OCT4_R      | GCCCCACTCCAACCTGG          |
| PGC-<br>1_F | AACACTTACAAGCCAAACCA       |
| PGC-<br>1_R | GCGTTCAATAGTCTTGTTCTC      |
| PGC-<br>1_F | TCCTCAACTATCTCGCTGAC       |
| PGC-<br>1_R | CTCACTGTCAATCTGGAAGA<br>G  |
| RIP140_F    | CCCATTTGCAGCAGTATTCTC      |
| RIP140_R    | GTAAGTCCCAACATCCTTCT<br>G  |
