# Supplementary material
Source: PubMed Central journal article supplement (PMC3021997)
Supplement: supp_124_3_348__5.pdf [file supp_124_3_348__5.pdf]

Supplementary Table S5. **Gene expression primers for independent cell-type comparisons (Figure 3A-C).** The housekeeping genes peptidylprolyl isomerase A (PPIA) and phosphoglycerate kinase 1 (PGK1) were selected by us from a previous evaluation of 15 commonly used housekeeping genes using the Vandesompele method (Vandesompele et al., 2002). The ct values from these two genes were then used for normalization of other genes using the same established normalization algorithm (Vandesompele et al., 2002).

|             |                             |
|-------------|-----------------------------|
| PPIA_F      | ATGCTGGACCCAACACAAAT        |
| PPIA_R      | TCTTTCACTTTGCCAAACACC       |
| PGK1_F      | TGCAAAGGCCTTGGAGAG          |
| PGK1_R      | TGGATCTTGTCTGCAACTTTA<br>GC |
| PGC-<br>1_F | TGAGAGGGCCAAGCAAAG          |
| PGC-<br>1_R | ATAAATCACACGGCGCTCTT        |
| PGC-<br>1_F | GGCAGGCCTCAGATCTAAAA        |
| PGC-<br>1_R | TCATGGGAGCCTTCTTGTCT        |
| RIP140_F    | CCCATTGCAGCAGTATTCTC        |
| RIP140_R    | GTAAGTCCAACATCCTTCTG        |
